# Supplementary material for: Coupled Effects of Acid Mine Drainage and Domestic Wastewater Reshape Sediment Microbial Communities
Source: Research Square preprint supplement (doi:10.21203/rs.3.rs-8297827/v1), 2026-01-16
Supplement: Supplementary file 1 [file b720525c05556ee129ce6950.docx]

# Supplementary Materials

# Coupled Effects of Acid Mine Drainage and Domestic Wastewater Reshape Sediment Microbial Communities

Shihong Zhang1 · Pan Wu1,2,3 * · Jian Zhang2 · Yisheng Mu1 · Jiarui Zhu1

1 College of Resources and Environmental Engineering, Guizhou University, Guiyang 550025, China;

2 Key Laboratory of Karst Georesources and Environment (Guizhou University), Ministry of Education, Guiyang 550025, China;

3 Guizhou Karst Environmental Ecosystems Observation and Research Station, Ministry of Education.

*Correspondence Author

**e-mail:** pwu@gzu.edu.cn

**Phone:** +86-136-0857-2205

**List of the supporting information:**

**Fig. S1** Schematic diagram of the stratigraphic structure and the aquifer of the top and bottom plates of the Liangshan Formation.

**Fig. S2** pH and Redox characteristics of water samples.

**Fig. S3** Results of a PCoA analysis of the differences in the bacterial distribution among samples.

**Fig. S4** RDA analysis of microbial communities and environmental factors.


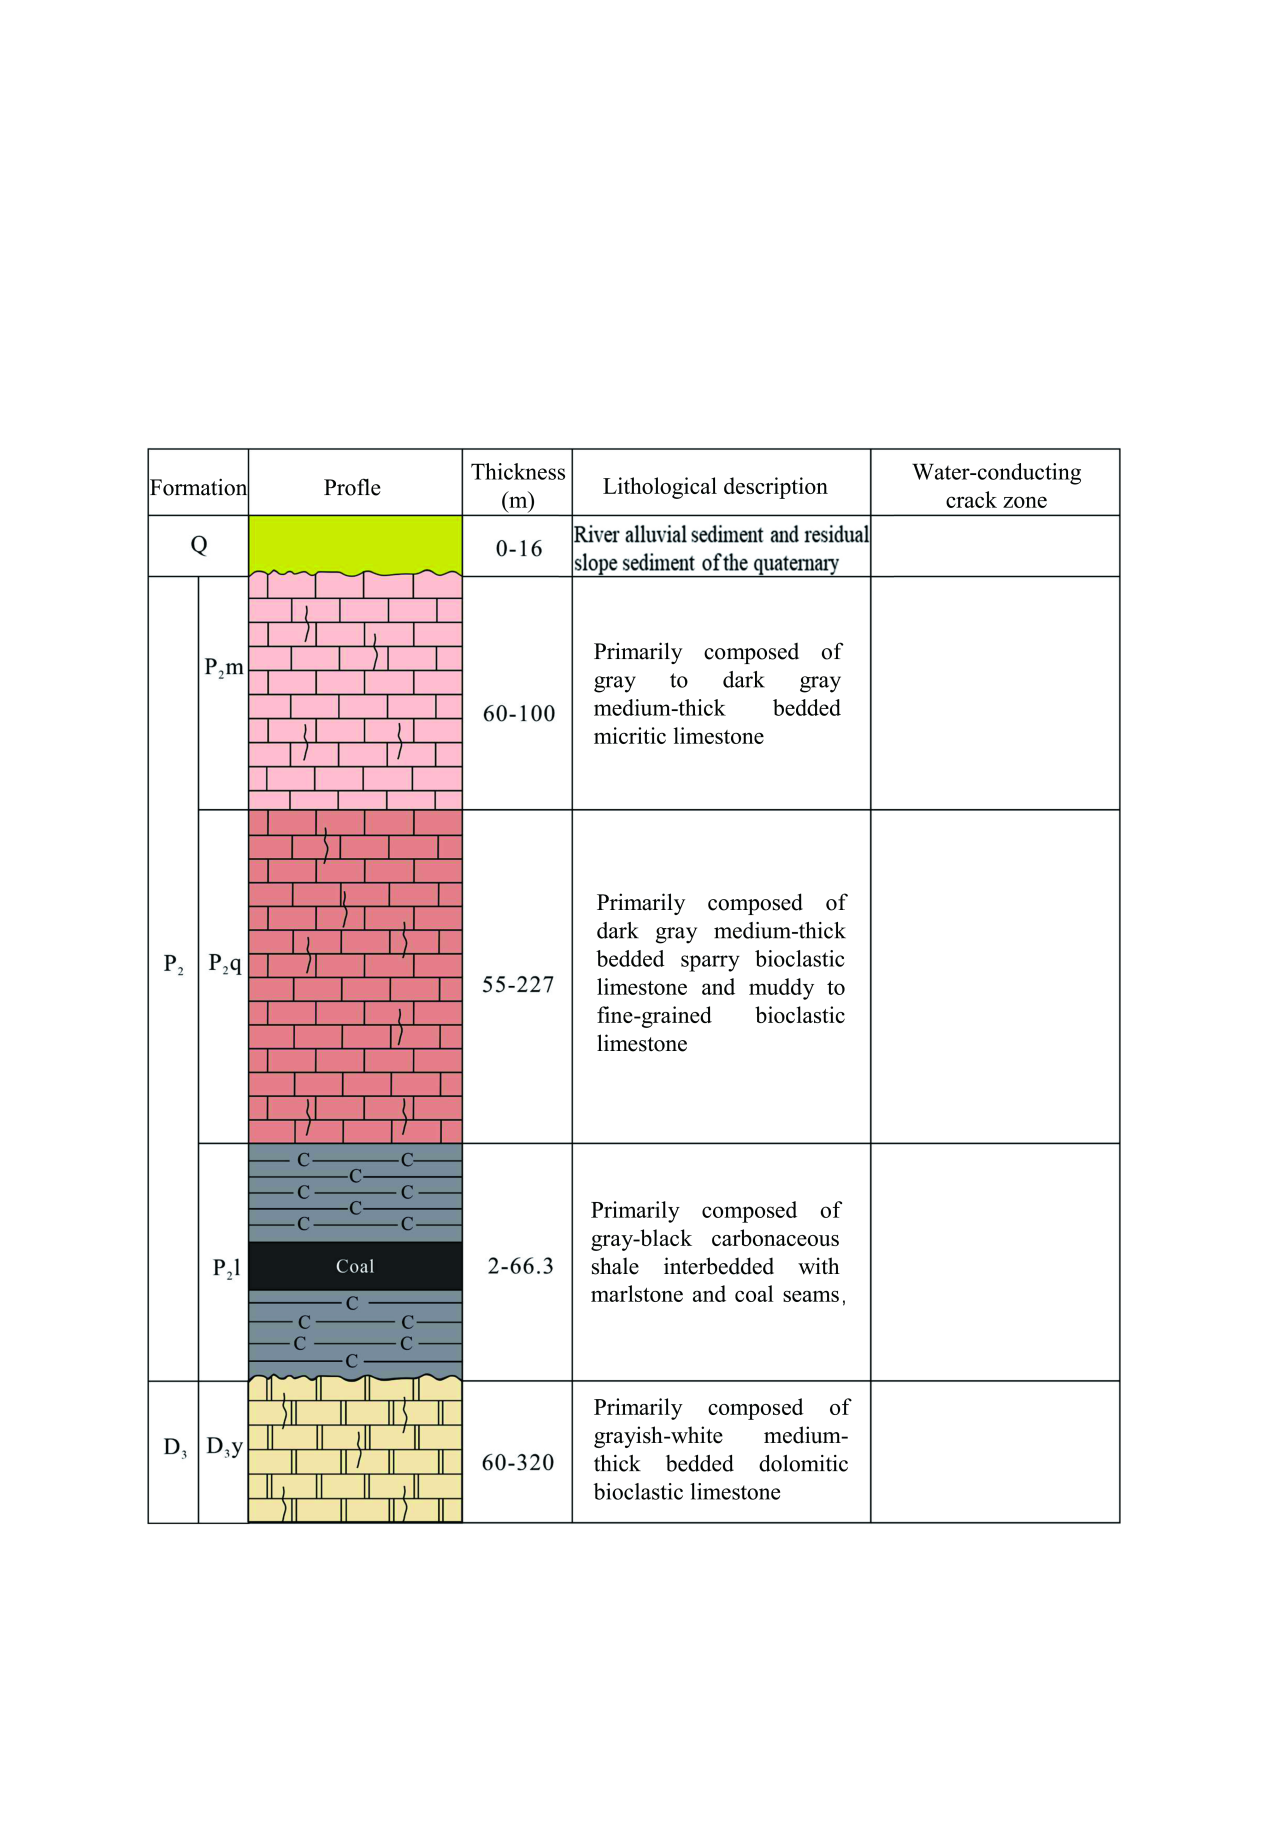


**Fig. S1** Schematic diagram of the stratigraphic structure and the aquifer of the top and bottom plates of the Liangshan Formation





**Fig. S2** pH and Redox characteristics of water samples.


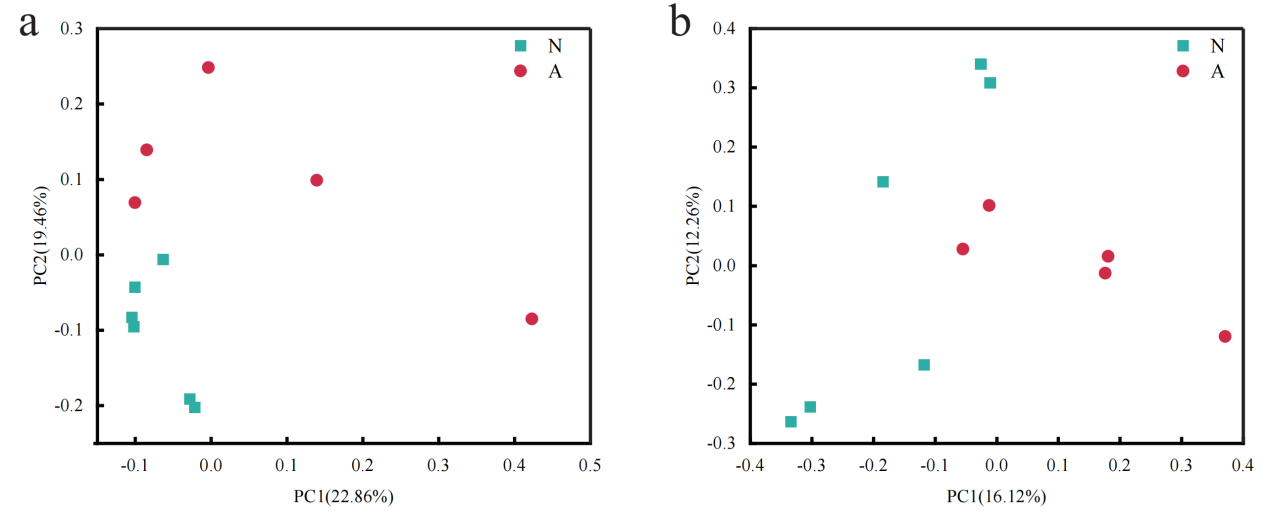


**Fig. S3** Results of a PCoA analysis of the differences in the bacterial

distribution among samples.


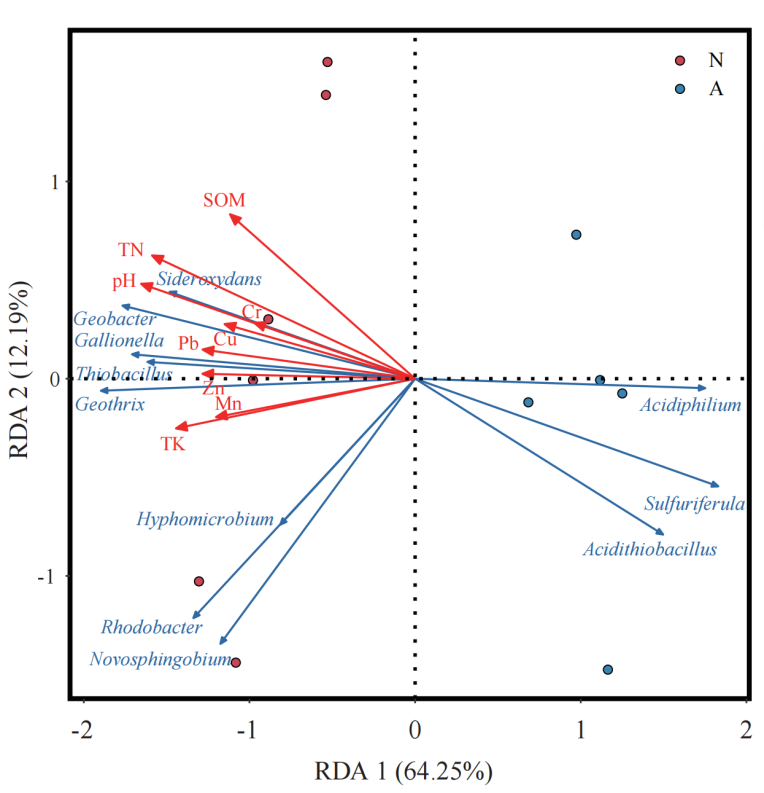


**Fig. S4** RDA analysis of microbial communities and environmental factors.
